# Supplementary material for: Validation and measurement invariance of the Occupational Depression Inventory in South Africa
Source: PubMed Central journal article supplement (PMC8675679; doi:10.1371/journal.pone.0261271), 2021-12-16

**odi1**

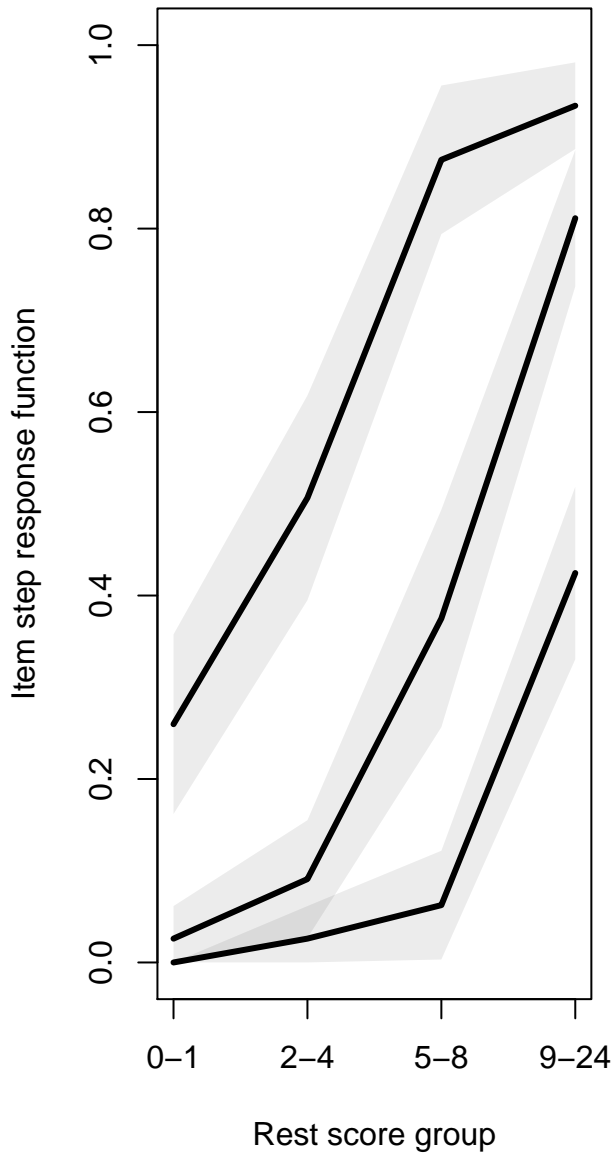

**odi1**

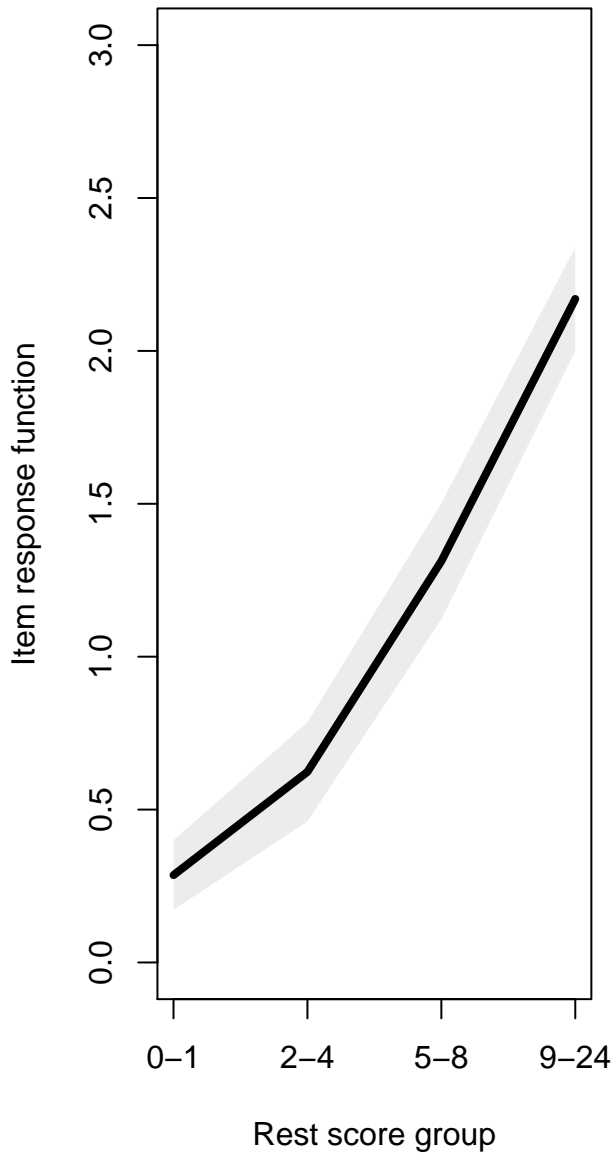

**odi2**

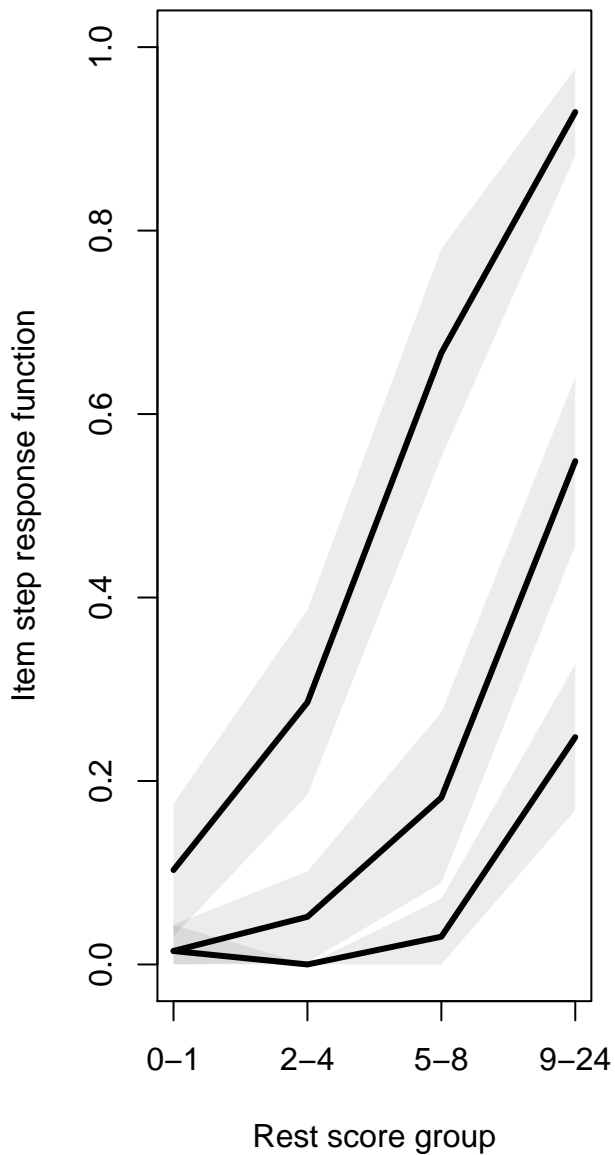

**odi2**

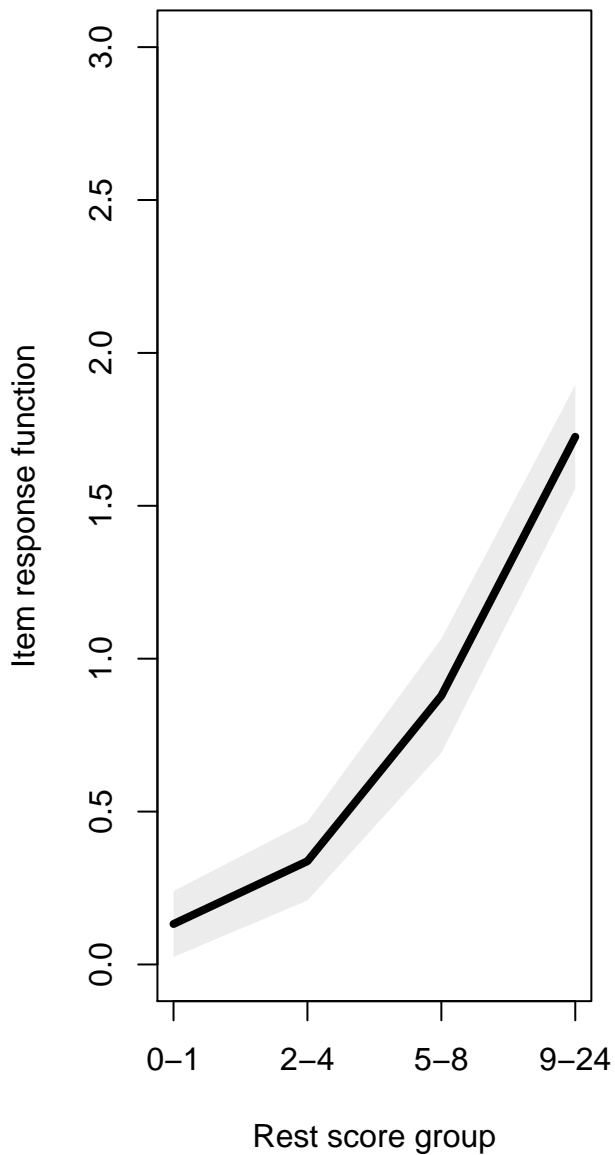

**odi3**

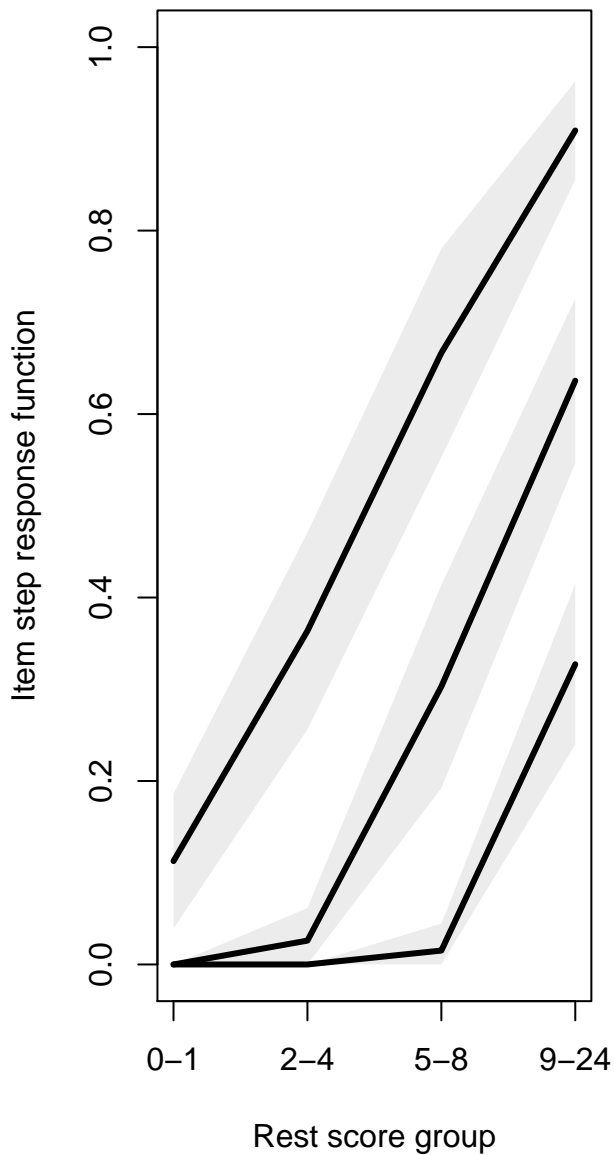

**odi3**

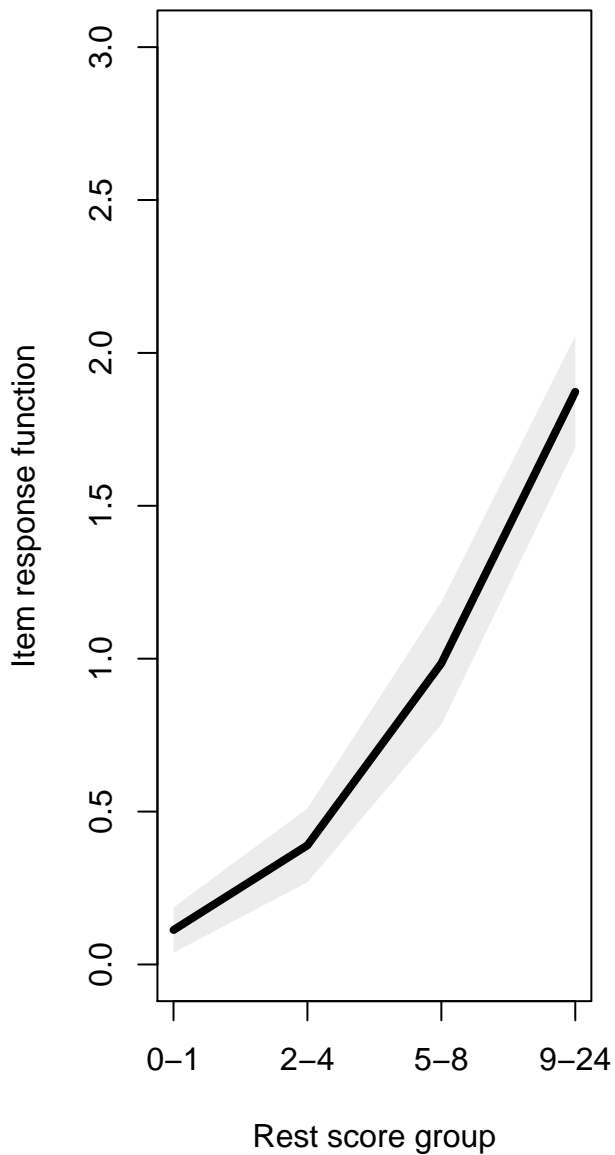

**odi4**

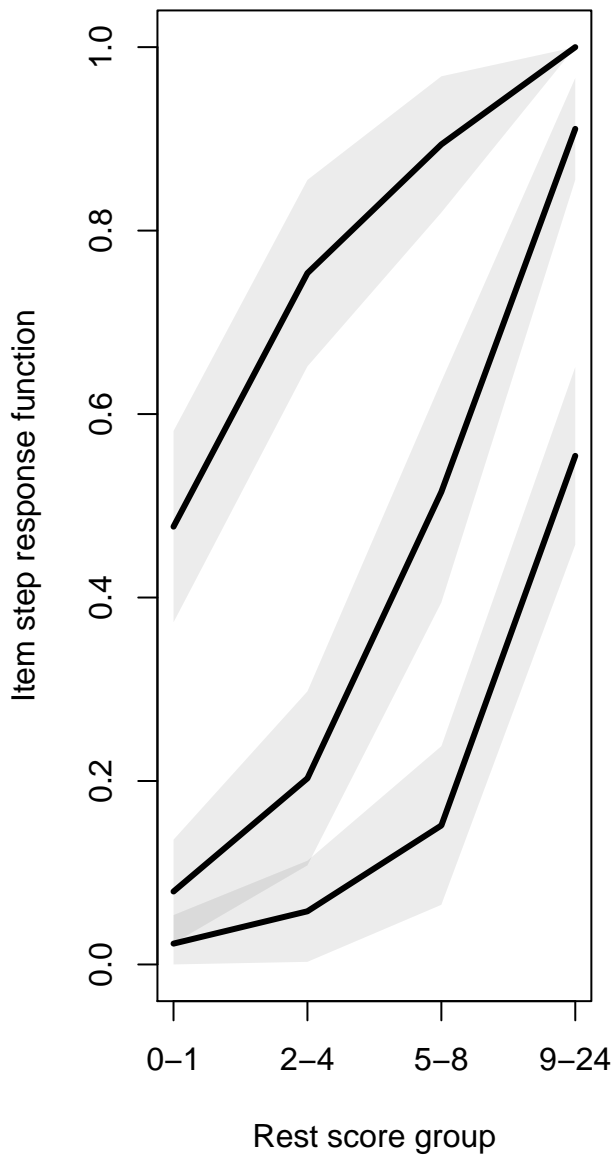

**odi4**

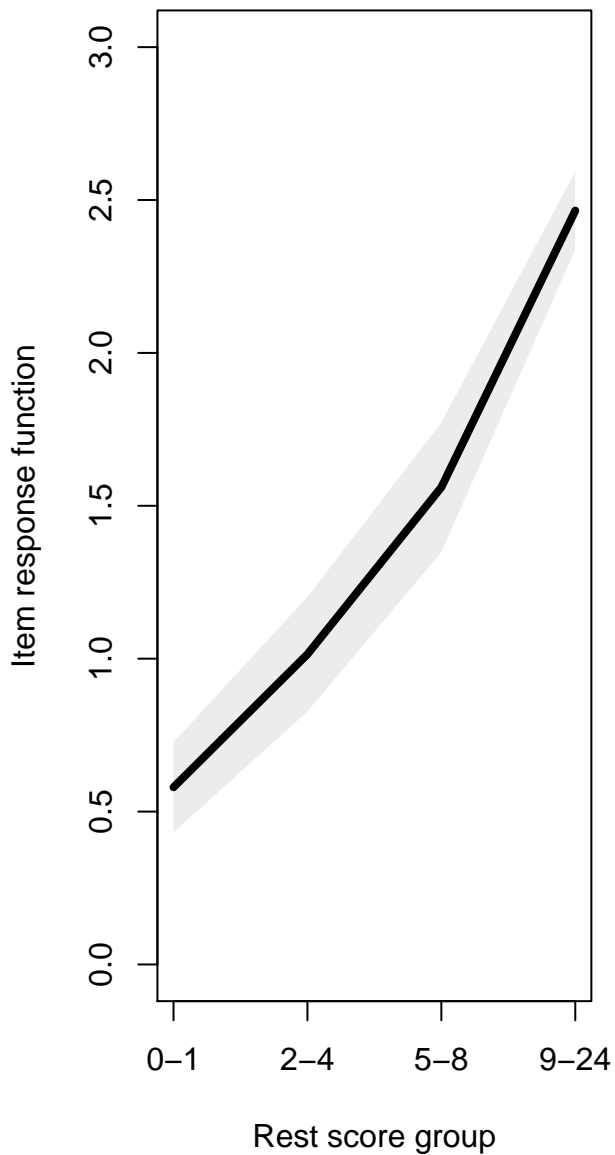

**odi5**

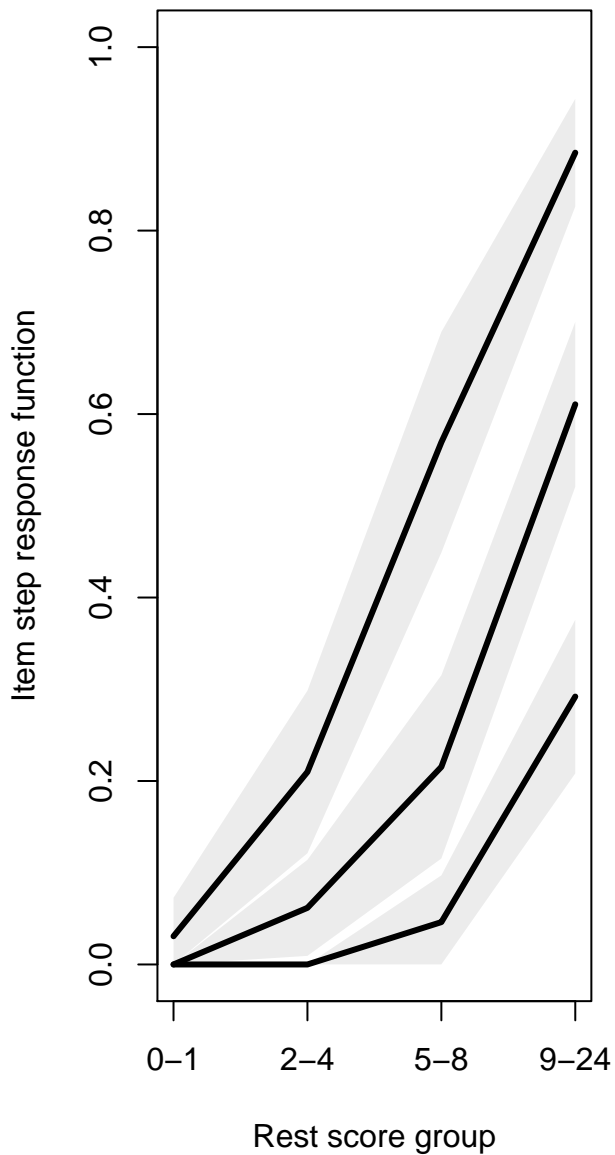

**odi5**

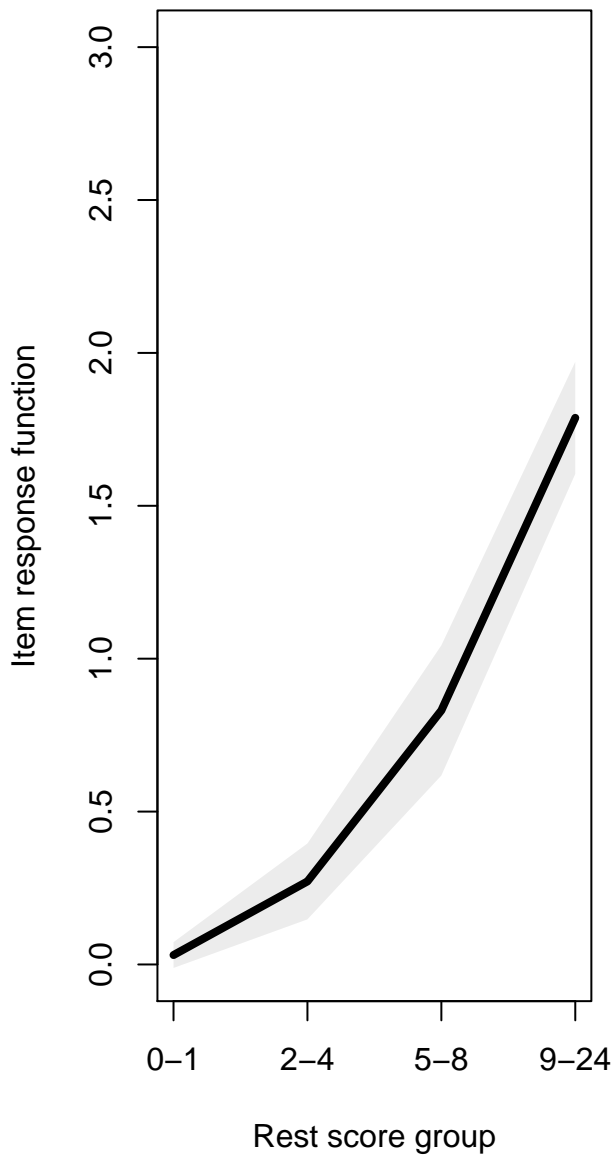

**odi6**

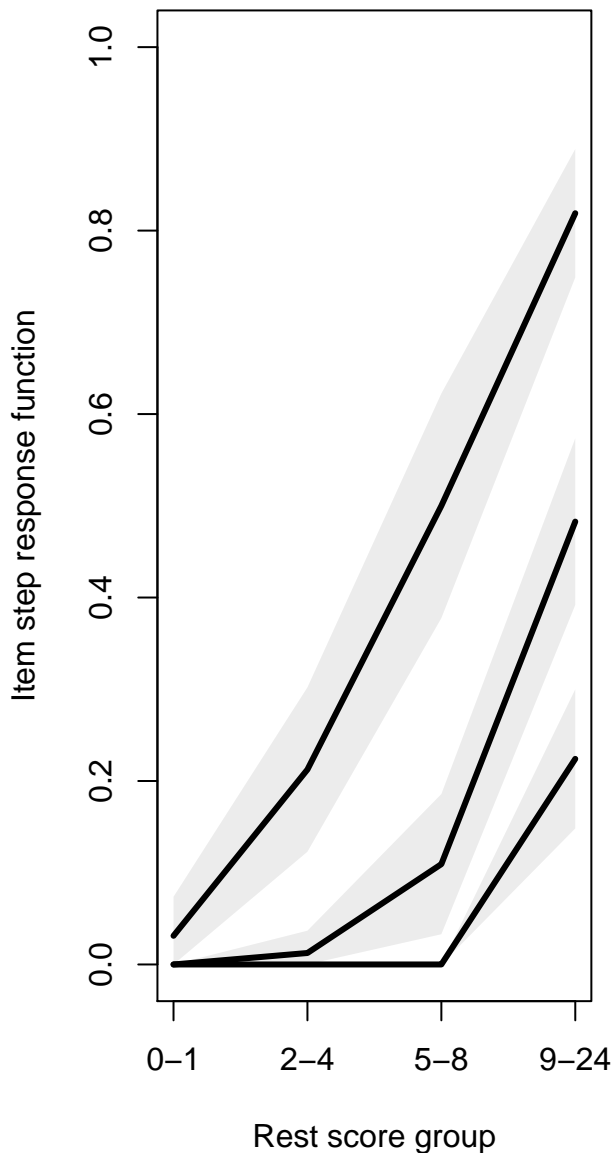

**odi6**

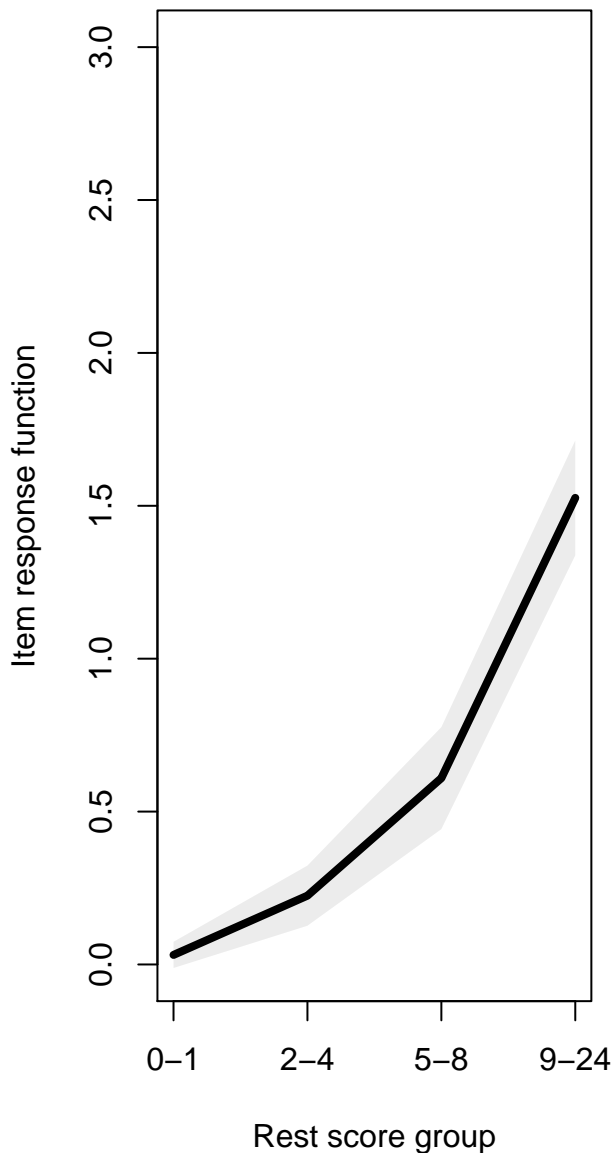

**odi7**

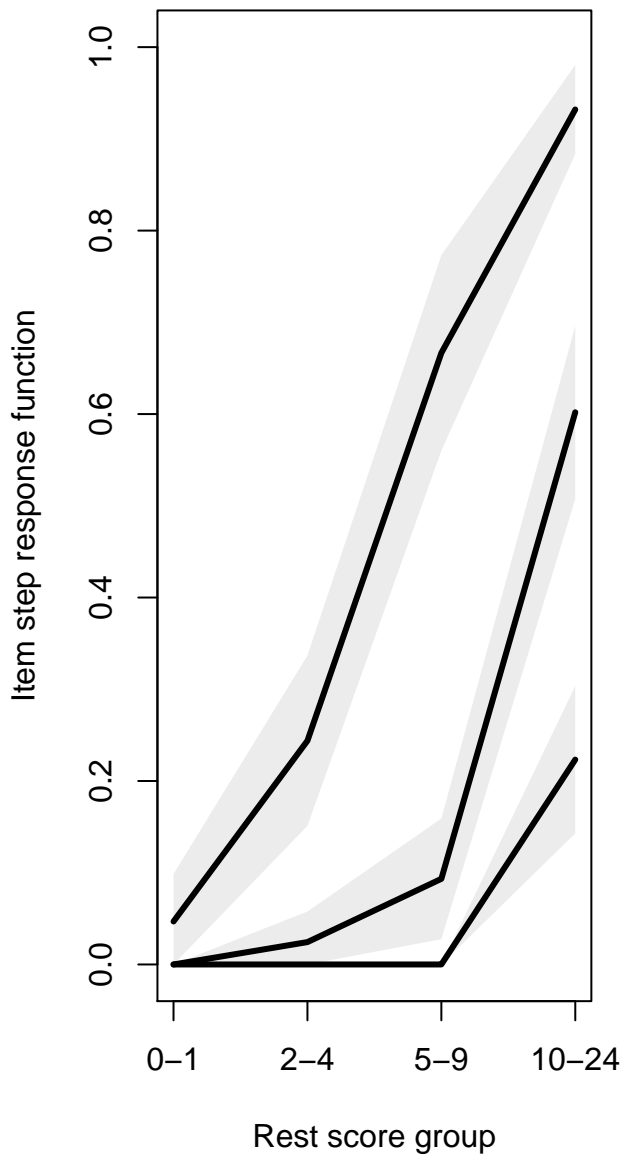

**odi7**

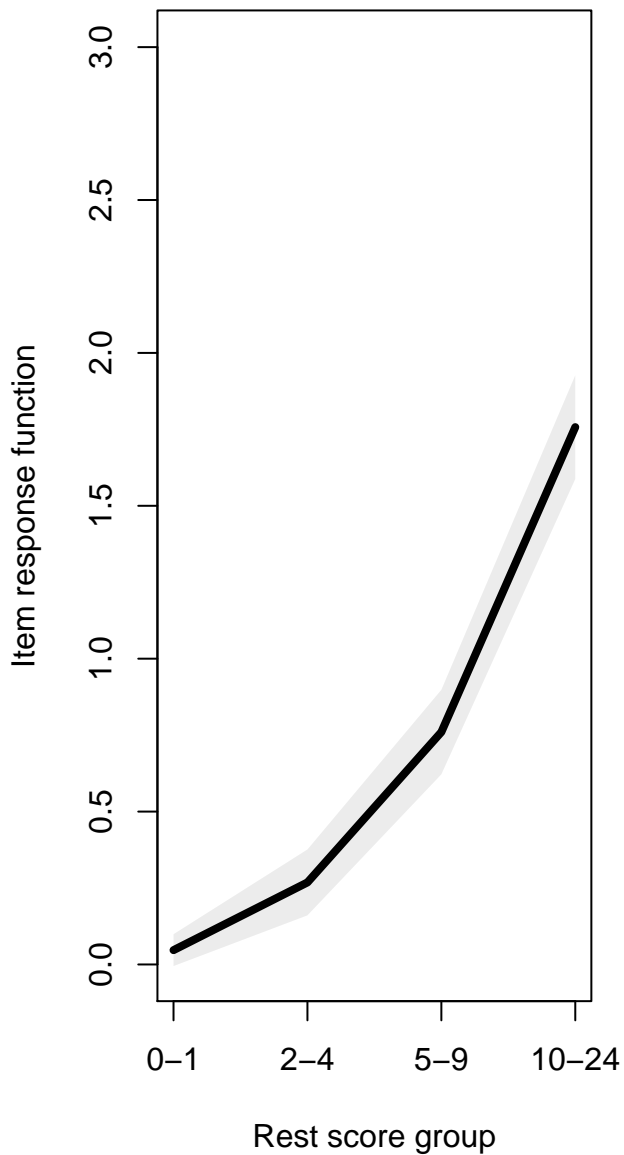

**odi8**

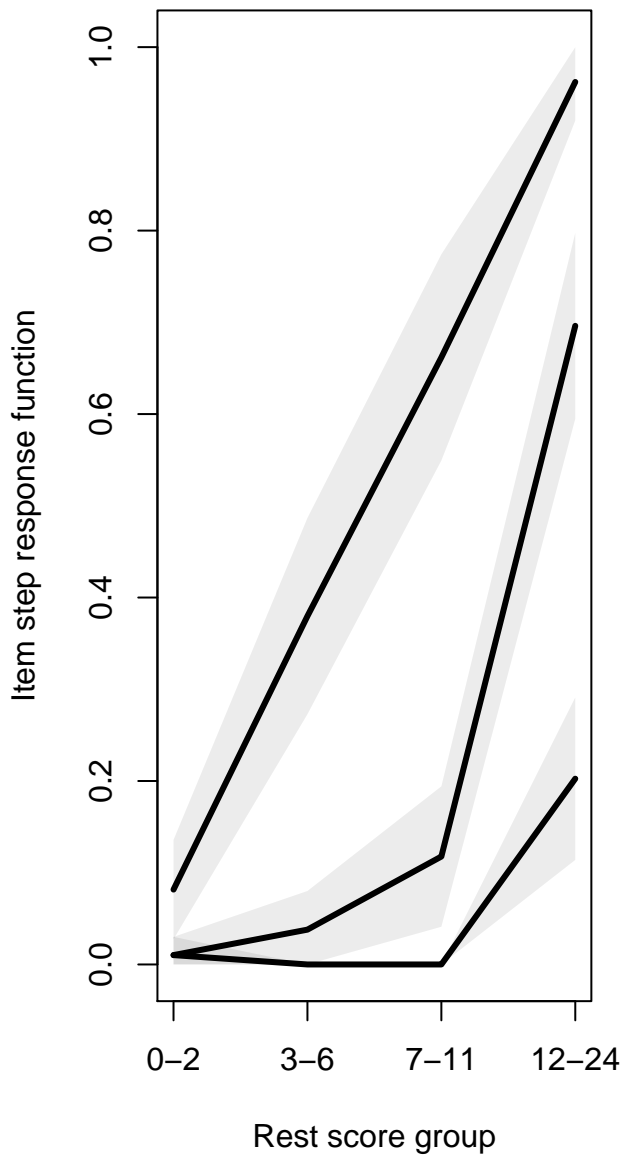

**odi8**

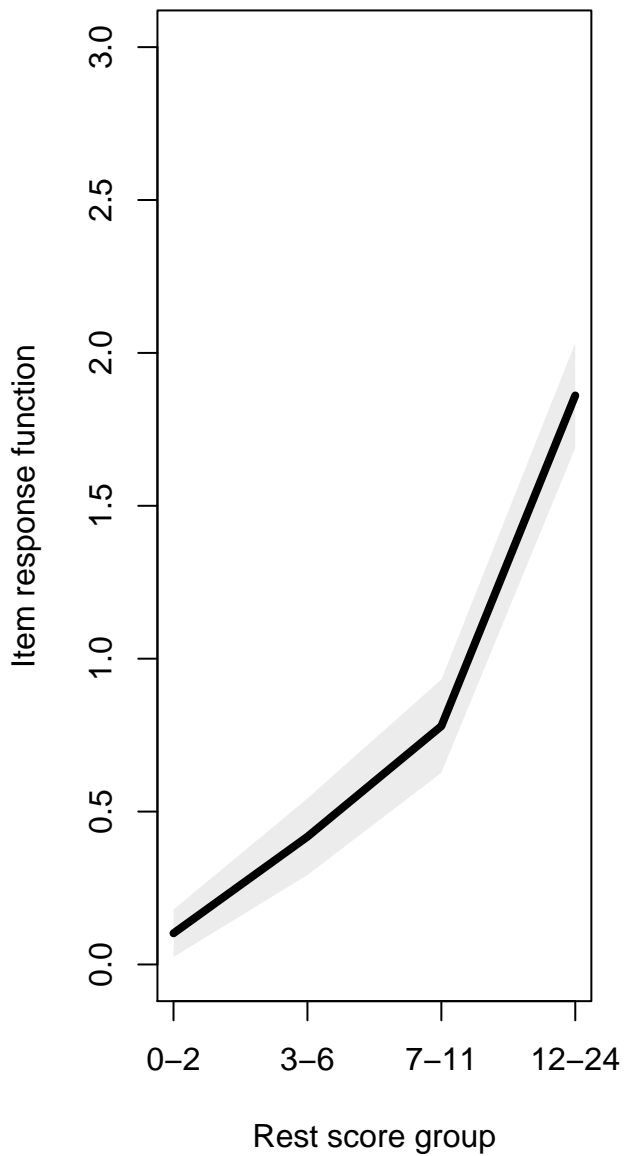



**odi9**

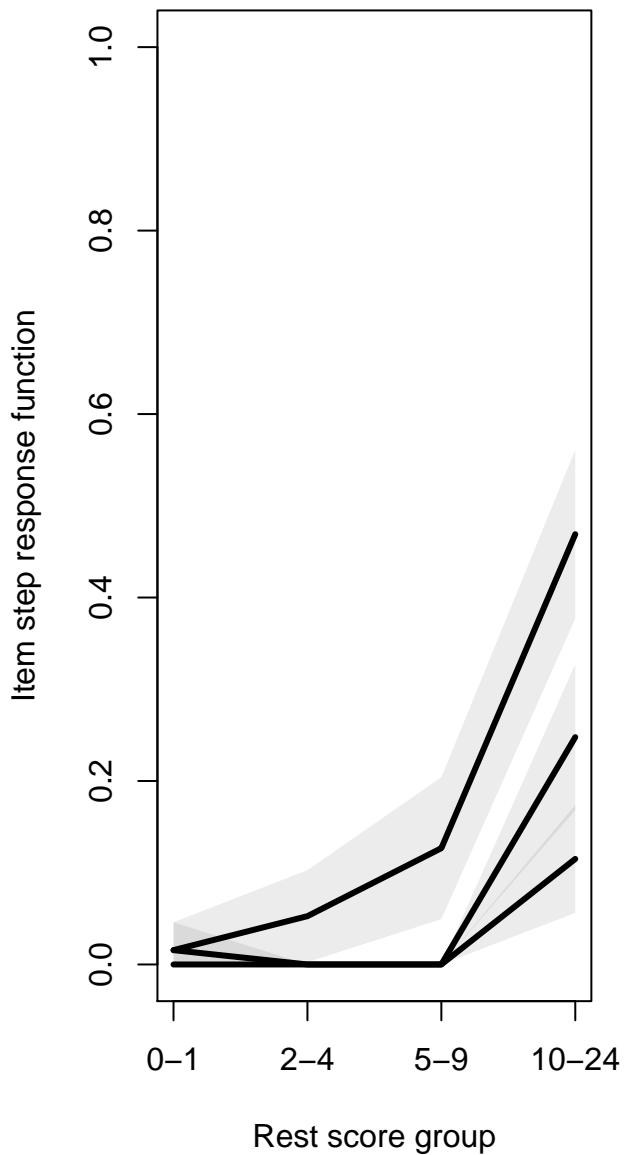

**odi9**

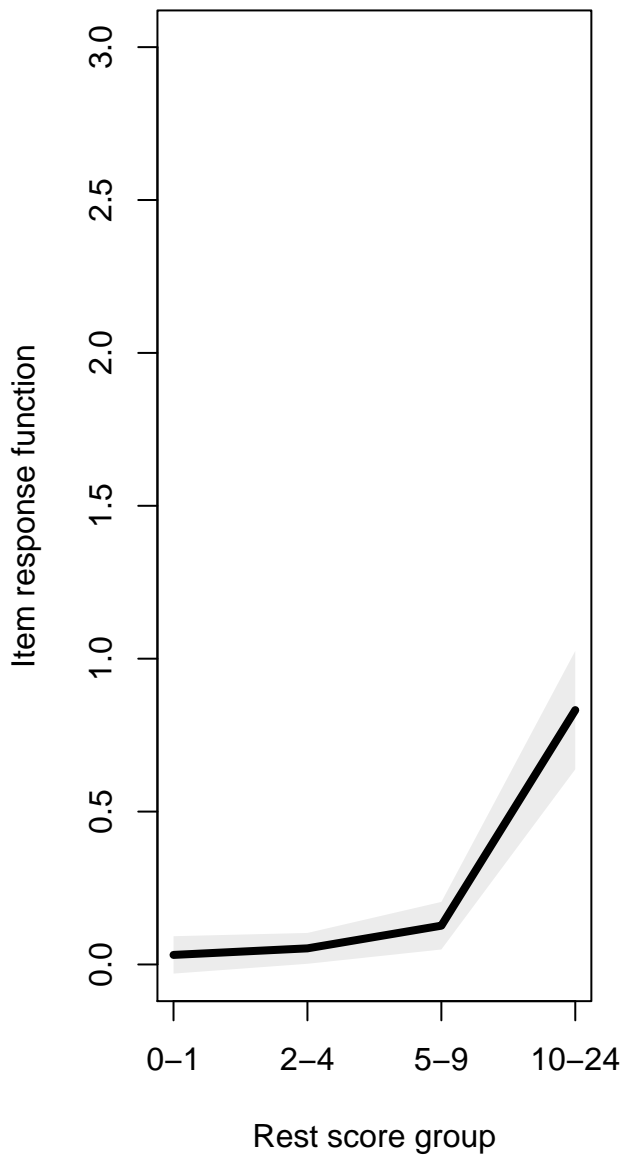

Supplement: pone.0261271.s001.pdf [file pone.0261271.s001.pdf]
